# Supplementary material for: When algorithms replace biologists: A Discrete Choice Experiment for the valuation of risk-prediction tools in Neurodegenerative Diseases
Source: Research Square preprint supplement (doi:10.21203/rs.3.rs-5333210/v1), 2024-12-18
Supplement: Supplementary file 2 [file 2dc9e59632f8aeb843cdb832.docx]

**Appendix A1. DCE survey development**

Survey design forms the backbone of any DCE (Bridges et al (2011), Johnson et al (2013)). This appendix gives detailed information on the development of the DCE survey that we used in this study.

**A.1.1 The choice task**

Each respondent was presented with successive scenarios featuring a varying set of attributes for the test. To build the set of attributes, we relied on a prior literature review: Huang et al. (2014)[[1]](#footnote-1)notably emphasized ‘accuracy’, and ‘anonymity’. Neumann et al. (2001)[[2]](#footnote-2) suggested that people value testing for personal and financial reasons (‘price’), but also express the need to counsel tested persons about accuracy and implications of test information (‘doctor reading’). We refined these attributes, adding our main point ‘AI versus saliva test’. We end up with 5 attributes: (1) the type of the test, (2) the reading of test results, (3) tests’ sensitivity, (4) tests’ specificity, (5) tests’ price.

Note that the curability of the disease which is an important driver of testing decision[[3]](#footnote-3) (Myers et al. 1990; Weller et al. 1995) has been included as a general context opening the questionnaire. We preferred to “prefix” the nature of the disease by respondent, to be able to focus on the characteristics of the test.

**A.1.2 Scenarios combination**

The full factorial design was generated and provided 324 possible combinations of all attribute levels (4 attributes at 3 levels and 1 attribute at 4 levels, 3^4 * 4^1=324). Each one corresponds to one of two possible options in a choice scenario. However, this number is too high to consider working with the complete design. We have chosen to reduce the number of possible combinations by considering a D-efficient fractional design that takes into account main effects and first order interactions. This leads to 70 possible combinations of attribute levels which, by random pair-wise matching, generate 35 scenarios of choice between two options. The D-efficiency of the fractional design generated is 82%.

For each person interviewed, 5 scenarios were drawn at random, from the 35 possible.

**A.1.3 Forced choice methodology**

We opted for the ‘forced choice’ for two reasons: i) according to the literature, this method seems acceptable, and even preferable (see references below); ii) the task was hard cognitively for respondent (they have to compare options with several attributes and figures, like sensitivity and specificity), and was not incentivized, although other parts of the questionnaire were gamified and incentivized; this would expose to a high risk of numerous “do not know” of this online study.

In the literature[[4]](#footnote-4), many papers put forward the ‘forced choice’. Jonker et al. (2021) stated that ‘a dual-response option format’ can provide (potentially useful) preference information for respondents who otherwise consistently choose the opt-out option. Unfortunately, there is still a lack of evidence about the quality of these additional choice data. Moreover, the different framing of the opt-out options could induce slightly different choice behavior, resulting in different preferences assessment and different adoption-rates estimates. Similarly, Veldwijk et al. reported that ‘including an opt-out reduces efficiency with respect to power’ (2013), and that ‘since respondents seem to learn from answering forced choice tasks, a dual response design might result in higher data quality compared to offering a direct opt-out option (2014). In their study, Determan et al. (2019) found that ‘the use of different unforced choice formats affects marginal utilities and welfare estimates and hence the conclusions that will be drawn from the DCE to inform health care decision making’. Last, Campbell & Erdem (2019) showed that ‘mis-specifying the opt-out effect has repercussions for marginal willingness to pay estimation and the forecasting of market shares’.

1. Huang, M. Y., Huston, S. A., & Perri, M. (2014). Consumer preferences for the predictive genetic test for Alzheimer disease. *Journal of genetic counseling*, 23(2), 172-178 [↑](#footnote-ref-1)
2. Neumann, P. J., Hammitt, J. K., Mueller, C., Fillit, H. M., Hill, J., Tetteh, N. A., & Kosik, K. S. (2001). Public attitudes about genetic testing for Alzheimer’s disease. *Health Affairs*, 20(5), 252-264. [↑](#footnote-ref-2)
3. Myers, R. E., Trock, B. J., Lerman, C., Wolf, T., Ross, E., & Engstrom, P. F. (1990). Adherence to colorectal cancer screening in an HMO population. *Preventive medicine*, *19*(5), 502-514.

   Weller, D. P., Owen, N., Hiller, J. E., Willson, K., & Wilson, D. (1995). Colorectal cancer and its prevention: prevalence of beliefs, attitudes, intentions and behaviour. *Australian Journal of Public Health*, *19*(1), 19-23. [↑](#footnote-ref-3)
4. Jonker, M. F., de Bekker-Grob, E. W., Veldwijk, J., Goossens, L. M. A., & Rutten-Van Molken, M. (2021). Improved External Validity of DCE Uptake Predictions Based on a Dual-Response None Option Format?. The Patient, 14(6), 867-867.

   Veldwijk, J., Lambooij, M. S., de Bekker-Grob, E., Smit, H. A., & de Wit, G. A. (2013). The effect of including an opt-out option in discrete choice experiments. Value in Health, 16(3), A46.

   Veldwijk, J., Lambooij, M. S., de Bekker-Grob, E. W., Smit, H. A., & de Wit, G. A. (2014). The effect of including an opt-out option in discrete choice experiments. PloS one, 9(11), e111805.

   Determann, D., Gyrd-Hansen, D., de Wit, G. A., de Bekker-Grob, E. W., Steyerberg, E. W., Lambooij, M. S., & Bjørnskov Pedersen, L. (2019). Designing unforced choice experiments to inform health care decision making: implications of using opt-out, neither, or status quo alternatives in discrete choice experiments. Medical Decision Making, 39(6), 681-692.

   Campbell, D., & Erdem, S. (2019). Including opt-out options in discrete choice experiments: issues to consider. The Patient-Patient-Centered Outcomes Research, 12, 1-14. [↑](#footnote-ref-4)
