# Supplementary material for: When algorithms replace biologists: A Discrete Choice Experiment for the valuation of risk-prediction tools in Neurodegenerative Diseases
Source: Research Square preprint supplement (doi:10.21203/rs.3.rs-5333210/v1), 2024-12-18
Supplement: Supplementary file 3 [file 80bf675706d176364ddd9d49.docx]

**Appendix A3. Participants sociodemographics**

**Table A1. Socio-demographics of the sample**

| **Variable** | **Distribution or Mean (Sd)** |
| --- | --- |
| Gender | 48.48% female  51.43% male  0.10% other |
| Age | M = 52.5 years, SD = 16.3 |
| Income | M = 3.759€, SD = 2.312€ |
| Education | High school or lower : 25.27%  Undergraduate level : 40.41%  Graduate level or above : 34.32% |
